# Supplementary material for: Characterization and Comparison of Two Complete Plastomes of Rosaceae Species (Potentilla dickinsii var. glabrata and Spiraea insularis) Endemic to Ulleung Island, Korea
Source: Int J Mol Sci. 2020 Jul 13;21(14):4933. doi: 10.3390/ijms21144933 (PMC7404287; doi:10.3390/ijms21144933)
Supplement: Supplementary file 1 [file ijms-21-04933-s001.xlsx]

## Sheet: Sheet1
Supplementary Table 1. The predicted RNA editing sites in the complete chloroplast genome of the two endemic Rosaceae in Ulleung Island.
Potentilla dickinsii var. glabrata							Spiraea insularis
Gene	Nt Pos	AA Pos	Align Col	Effect	Score		Gene	Nt Pos	AA Pos	Align Col	Effect	Score
							accD	13	5	6	CGG (R) => TGG (W)	1
							atpF	92	31	31	CCA (P) => CTA (L)	0.86
							atpI	629	210	213	TCA (S) => TTA (L)	1
clpP	559	187	187	CAT (H) => TAT (Y)	1		clpP	559	187	187	CAT (H) => TAT (Y)	1
matK	532	178	191	CTC (L) => TTC (F)	0.86		matK	538	180	193	CTC (L) => TTC (F)	0.86
	619	207	222	CTC (L) => TTC (F)	1			631	211	224	CTC (L) => TTC (F)	1
	1172	391	408	TCG (S) => TTG (L)	0.86			646	216	229	CAT (H) => TAT (Y)	1
	1354	452	469	CCT (P) => TCT (S)	0.86			923	308	323	TCT (S) => TTT (F)	0.86
								1184	395	410	TCG (S) => TTG (L)	0.86
ndhA	14	5	5	ACA (T) => ATA (I)	1		ndhA	341	114	114	TCA (S) => TTA (L)	1
	575	192	192	TCA (S) => TTA (L)	1			1073	358	358	TCC (S) => TTC (F)	1
	1082	361	361	TCC (S) => TTC (F)	1
ndhB	149	50	50	TCA (S) => TTA (L)	1		ndhB	149	50	50	TCA (S) => TTA (L)	1
	586	196	196	CAC (H) => TAC (Y)	1			467	156	156	CCA (P) => CTA (L)	1
	611	204	204	TCA (S) => TTA (L)	0.8			542	181	181	ACG (T) => ATG (M)	1
	746	249	249	TCT (S) => TTT (F)	1			586	196	196	CAC (H) => TAC (Y)	1
	830	277	277	TCA (S) => TTA (L)	1			611	204	204	TCA (S) => TTA (L)	0.8
	836	279	279	TCA (S) => TTA (L)	1			737	246	246	CCA (P) => CTA (L)	1
	1112	371	371	TCA (S) => TTA (L)	1			746	249	249	TCT (S) => TTT (F)	1
	1481	494	494	CCA (P) => CTA (L)	1			830	277	277	TCA (S) => TTA (L)	1
								836	279	279	TCA (S) => TTA (L)	1
								1255	419	419	CAT (H) => TAT (Y)	1
								1481	494	494	CCA (P) => CTA (L)	1
ndhD	47	16	16	TCC (S) => TTC (F)	0.8		ndhD	47	16	16	TCC (S) => TTC (F)	0.8
	599	200	200	TCA (S) => TTA (L)	1			313	105	105	CGG (R) => TGG (W)	0.8
	674	225	225	TCA (S) => TTA (L)	1			599	200	200	TCA (S) => TTA (L)	1
	887	296	296	CCG (P) => CTG (L)	1			887	296	296	CCT (P) => CTT (L)	1
	1298	433	433	TCA (S) => TTA (L)	0.8			1405	469	469	CTT (L) => TTT (F)	0.8
	1408	470	470	CTT (L) => TTT (F)	0.8
ndhF	290	97	97	TCA (S) => TTA (L)	1		ndhF	290	97	97	TCA (S) => TTA (L)	1
	1852	618	625	CTT (L) => TTT (F)	1			392	131	131	TCC (S) => TTC (F)	1
								1496	499	499	ACG (T) => ATG (M)	0.8
								1577	526	526	TCT (S) => TTT (F)	1
								1769	590	595	CCT (P) => CTT (L)	0.8
								1858	620	625	CTT (L) => TTT (F)	1
ndhG	314	105	105	ACA (T) => ATA (I)	0.8		ndhG	314	105	105	ACA (T) => ATA (I)	0.8
								494	165	165	GCG (A) => GTG (V)	0.8
petB	611	204	204	CCA (P) => CTA (L)	1		petB	611	204	204	CCA (P) => CTA (L)	1
petG	14	5	5	TCT (S) => TTT (F)	0.86
							psbE	214	72	72	CCT (P) => TCT (S)	1
							psbF	77	26	26	TCT (S) => TTT (F)	1
rpl23	194	65	65	ACT (T) => ATT (I)	0.86
rpoA	830	277	279	TCA (S) => TTA (L)	1		rpoA	830	277	279	TCA (S) => TTA (L)	1
rpoB	338	113	113	TCT (S) => TTT (F)	1		rpoB	338	113	113	TCT (S) => TTT (F)	1
	551	184	185	TCA (S) => TTA (L)	1			551	184	185	TCA (S) => TTA (L)	1
	566	189	190	TCG (S) => TTG (L)	1			566	189	190	TCG (S) => TTG (L)	1
	593	198	199	GCT (A) => GTT (V)	0.86			2000	667	684	TCT (S) => TTT (F)	1
	2000	667	684	TCT (S) => TTT (F)	1
	2426	809	827	TCA (S) => TTA (L)	0.86
rpoC2	1493	498	517	ACG (T) => ATG (M)	0.86		rpoC2	1493	498	517	ACG (T) => ATG (M)	0.86
	1585	529	548	CTT (L) => TTT (F)	1			1774	592	615	CGT (R) => TGT (C)	0.86
	1771	591	613	CGT (R) => TGT (C)	0.86			2282	761	948	GCC (A) => GTC (V)	1
	3713	1238	1452	TCA (S) => TTA (L)	0.86			3725	1242	1452	TCA (S) => TTA (L)	0.86
rps2	248	83	83	TCA (S) => TTA (L)	1		rps2	248	83	83	TCA (S) => TTA (L)	1
rps14	80	27	27	TCA (S) => TTA (L)	1		rps14	149	50	53	TCA (S) => TTA (L)	1
	149	50	53	CCA (P) => CTA (L)	1
							rps16	212	71	71	TCA (S) => TTA (L)	0.83

## Sheet: Sheet2
accD	13	5	6	CGG (R) => TGG (W)	1		clpP	559	187	187	CAT (H) => TAT (Y)	1
atpF	92	31	31	CCA (P) => CTA (L)	0.86		matK	532	178	191	CTC (L) => TTC (F)	0.86
atpI	629	210	213	TCA (S) => TTA (L)	1			619	207	222	CTC (L) => TTC (F)	1
clpP	559	187	187	CAT (H) => TAT (Y)	1			1172	391	408	TCG (S) => TTG (L)	0.86
matK	538	180	193	CTC (L) => TTC (F)	0.86			1354	452	469	CCT (P) => TCT (S)	0.86
	631	211	224	CTC (L) => TTC (F)	1		ndhA	14	5	5	ACA (T) => ATA (I)	1
	646	216	229	CAT (H) => TAT (Y)	1			575	192	192	TCA (S) => TTA (L)	1
	923	308	323	TCT (S) => TTT (F)	0.86			1082	361	361	TCC (S) => TTC (F)	1
	1184	395	410	TCG (S) => TTG (L)	0.86		ndhB	149	50	50	TCA (S) => TTA (L)	1
ndhA	341	114	114	TCA (S) => TTA (L)	1			586	196	196	CAC (H) => TAC (Y)	1
	1073	358	358	TCC (S) => TTC (F)	1			611	204	204	TCA (S) => TTA (L)	0.8
ndhB	149	50	50	TCA (S) => TTA (L)	1			746	249	249	TCT (S) => TTT (F)	1
	467	156	156	CCA (P) => CTA (L)	1			830	277	277	TCA (S) => TTA (L)	1
	542	181	181	ACG (T) => ATG (M)	1			836	279	279	TCA (S) => TTA (L)	1
	586	196	196	CAC (H) => TAC (Y)	1			1112	371	371	TCA (S) => TTA (L)	1
	611	204	204	TCA (S) => TTA (L)	0.8			1481	494	494	CCA (P) => CTA (L)	1
	737	246	246	CCA (P) => CTA (L)	1		ndhD	47	16	16	TCC (S) => TTC (F)	0.8
	746	249	249	TCT (S) => TTT (F)	1			599	200	200	TCA (S) => TTA (L)	1
	830	277	277	TCA (S) => TTA (L)	1			674	225	225	TCA (S) => TTA (L)	1
	836	279	279	TCA (S) => TTA (L)	1			887	296	296	CCG (P) => CTG (L)	1
	1255	419	419	CAT (H) => TAT (Y)	1			1298	433	433	TCA (S) => TTA (L)	0.8
	1481	494	494	CCA (P) => CTA (L)	1			1408	470	470	CTT (L) => TTT (F)	0.8
ndhD	47	16	16	TCC (S) => TTC (F)	0.8		ndhF	290	97	97	TCA (S) => TTA (L)	1
	313	105	105	CGG (R) => TGG (W)	0.8			1852	618	625	CTT (L) => TTT (F)	1
	599	200	200	TCA (S) => TTA (L)	1		ndhG	314	105	105	ACA (T) => ATA (I)	0.8
	887	296	296	CCT (P) => CTT (L)	1		petB	611	204	204	CCA (P) => CTA (L)	1
	1405	469	469	CTT (L) => TTT (F)	0.8		petG	14	5	5	TCT (S) => TTT (F)	0.86
							rpl23	194	65	65	ACT (T) => ATT (I)	0.86
ndhF	290	97	97	TCA (S) => TTA (L)	1		rpoA	830	277	279	TCA (S) => TTA (L)	1
	392	131	131	TCC (S) => TTC (F)	1		rpoB	338	113	113	TCT (S) => TTT (F)	1
	1496	499	499	ACG (T) => ATG (M)	0.8			551	184	185	TCA (S) => TTA (L)	1
	1577	526	526	TCT (S) => TTT (F)	1			566	189	190	TCG (S) => TTG (L)	1
	1769	590	595	CCT (P) => CTT (L)	0.8			593	198	199	GCT (A) => GTT (V)	0.86
	1858	620	625	CTT (L) => TTT (F)	1			2000	667	684	TCT (S) => TTT (F)	1
ndhG	314	105	105	ACA (T) => ATA (I)	0.8			2426	809	827	TCA (S) => TTA (L)	0.86
	494	165	165	GCG (A) => GTG (V)	0.8		rpoC2	1493	498	517	ACG (T) => ATG (M)	0.86
petB	611	204	204	CCA (P) => CTA (L)	1			1585	529	548	CTT (L) => TTT (F)	1
psbE	214	72	72	CCT (P) => TCT (S)	1			1771	591	613	CGT (R) => TGT (C)	0.86
psbF	77	26	26	TCT (S) => TTT (F)	1			3713	1238	1452	TCA (S) => TTA (L)	0.86
rpoA	830	277	279	TCA (S) => TTA (L)	1		rps2	248	83	83	TCA (S) => TTA (L)	1
rpoB	338	113	113	TCT (S) => TTT (F)	1		rps14	80	27	27	TCA (S) => TTA (L)	1
	551	184	185	TCA (S) => TTA (L)	1			149	50	53	CCA (P) => CTA (L)	1
	566	189	190	TCG (S) => TTG (L)	1
	2000	667	684	TCT (S) => TTT (F)	1
rpoC2	1493	498	517	ACG (T) => ATG (M)	0.86
	1774	592	615	CGT (R) => TGT (C)	0.86
	2282	761	948	GCC (A) => GTC (V)	1
	3725	1242	1452	TCA (S) => TTA (L)	0.86
rps2	248	83	83	TCA (S) => TTA (L)	1
rps14	149	50	53	TCA (S) => TTA (L)	1
rps16	212	71	71	TCA (S) => TTA (L)	0.83
